# Supplementary material for: Nitrogen doping in ion-exchangeable layered tantalate towards visible-light induced water oxidation
Source: Royal Society of Chemistry journal article supplement (doi:10.1039/c0cc05440b), 2011-01-01
Supplement: c0cc05440b.pdf [file c0cc05440b.pdf]

Supplementary Material (ESI) for Chemical Communications  
This journal is (c) The Royal Society of Chemistry 2010

## Supplementary Material (ESI) for Chemical Communications

### **Nitrogen doping in ion-exchangeable layered tantalate towards visible-light induced water oxidation**

Xu Zong,<sup>a</sup> Chenghua Sun,<sup>ab</sup> Zhigang Chen,<sup>c</sup> Aniruddh Mukherji,<sup>a</sup> Hao Wu,<sup>a</sup> Jin Zou,<sup>cd</sup>  
Sean Smith,<sup>b</sup> Gao Qing Lu\*<sup>a</sup> and Lianzhou Wang\*<sup>a</sup>

<sup>a</sup> ARC Centre of Excellence for Functional Nanomaterials, School of Chemical Engineering and AIBN, The University of Queensland, Qld 4072, Australia. E-mail: l.wang@uq.edu.au; maxlu@uq.edu.au; Fax: +61 7 33656074; Tel: +61 7 33653735

<sup>b</sup> Centre for Computational Molecular Science, Australian Institute for Bioengineering and Nanotechnology, The University of Queensland, QLD 4072 Australia.

<sup>c</sup> Materials Engineering, The University of Queensland, QLD 4072, Australia

<sup>d</sup> Centre for Microscopy and Microanalysis, The University of Queensland, QLD 4072, Australia

## 1. Experimental details

### 1.1 Preparation of photocatalysts

The ion-exchangeable layered tantalate  $\text{CsCa}_2\text{Ta}_3\text{O}_{10}$  was prepared with a procedure reported in the literature.<sup>1</sup> Nitrogen doping in this layered tantalate was achieved by calcining  $\text{CsCa}_2\text{Ta}_3\text{O}_{10}$  at temperatures from 923 to 1073 K in an ammonia atmosphere. Protonated layered compound of nitrogen-doped  $\text{CsCa}_2\text{Ta}_3\text{O}_{10}$  was prepared by ion-exchange of the nitrogen-doped  $\text{CsCa}_2\text{Ta}_3\text{O}_{10}$  compound in 4 M  $\text{HNO}_3$  solution for 10 days.

### 1.2 Characterization of photocatalysts

The synthesized products were comprehensively characterized by X-ray diffraction (XRD, Rigaku D/max 2500PC), UV-Vis spectrometer (Shimadzu 2200), X-ray photoelectron spectroscopy (XPS, Thermo Escalab 250, a monochromatic Al KR x-ray source), and transmission electron microscopy (TEM, Philips Tecnei F20).

The content of nitrogen dopant was analyzed using a flash elemental analyser (LECO TruSpec CHN analyser).

### 1.3 Photocatalytic reactions

The photocatalytic reactions were carried out in a quartz reaction cell connected to a closed gas circulation and evacuation system. 0.5 g of catalyst was suspended in 300 ml aqueous solution containing different sacrificial reagents. For photocatalytic  $\text{O}_2$  evolution reactions,  $\text{AgNO}_3$  (0.01 M) together with  $\text{La}_2\text{O}_3$  (0.5 g) was used. For photocatalytic  $\text{H}_2$  evolution reactions, methanol (20 V%) was used as the sacrificial reagent and Pt (0.5 wt%) loaded with photoreduction method was used as the cocatalyst. The suspension was then thoroughly degassed and irradiated by a 300 W Xe lamp (Beijing Trusttech Co. Ltd., PLS-SXE-300UV) equipped with an optical cut-off filter ( $\lambda > 400$  nm) to eliminate ultraviolet light and a water filter to remove infrared light. The temperature of the reactant solution was maintained at  $293 \pm 5$  K by a flow of cooling water during the reaction. The amounts of  $\text{O}_2$  and  $\text{H}_2$  produced were

analyzed using an on-line gas chromatography.

#### 1.4 Computational details

In our calculation  $\text{CsCa}_2\text{Ta}_3\text{O}_{10}$  is simulated by a  $2 \times 2 \times 1$  supercell (64 atoms, dimension size:  $7.73 \text{ \AA} \times 7.73 \text{ \AA} \times 15.25 \text{ \AA}$ ), as shown in Fig. S1 (a). To investigate the N-doping effect, one oxygen (one-coordinated) is replaced by nitrogen, as shown in Fig. S1 (b), with a doping concentration of 1/64 (atomic ratio). The electronic structures are obtained by spin-polarized density functional theory (DFT) calculations using the DMol3 code.<sup>3, 4</sup> The generalized gradient approximation (GGA) with the functional of Perdew–Burke–Ernzerhof functional (PBE)<sup>5</sup> was utilized, together with a double-numeric basis of effective core potentials for the description of core electrons. During our calculations, the convergence criteria for structure optimizations were set to (1) energy tolerance of  $1.0 \times 10^{-6}$  Ha per atom, (2) maximum force tolerance of  $1.0 \times 10^{-3}$  Ha/ $\text{\AA}$  and (3) maximum displacement tolerance of  $1.0 \times 10^{-3}$   $\text{\AA}$ . The k-space is sampled only by gamma point due to the large size of the supercell. All local density of states (DOS) are expressed by the contribution of one atom for the comparison purpose. The above computation methods have been successfully employed in our recent doping studies of various catalysts (like graphitic  $\text{C}_3\text{N}_4$ <sup>6</sup>, and  $\text{TiO}_2$ <sup>7</sup>).

#### References:

1. K. Toda, T. Teranishi, Z. G. Ye, M. Sato and Y. Hinatsu, Mater. Res. Bull., 1999, 34, 971-982.
2. G. Liu, L. Z. Wang, C. H. Sun, Z. G. Chen, X. X. Yan, L. Cheng, H. M. Cheng and G. Q. Lu, Chem. Commun., 2009, 1383-1385.
3. B. Delley, J. Chem. Phys., 2000, 113, 7756-7764.
4. B. Delley, J. Chem. Phys., 1990, 92, 508-517.
5. J. P. Perdew, K. Burke and M. Ernzerhof, Phys. Rev. Lett., 1996, 77, 3865-3868.
6. G. Liu, P. Niu, C. H. Sun, S. C. Smith, Z. G. Chen, G. Q. Lu and H. M. Cheng, J. Am. Chem. Soc., 2010, 132, 11642-11648.
7. G. Liu, C. H. Sun, L. N. Cheng, Y. G. Jin, H. F. Lu, L. Z. Wang, S. C. Smith, G. Q. Lu and H. M. Cheng, J. Phys. Chem. C, 2009, 113, 12317-12324.

## 2. Results of Characterizations

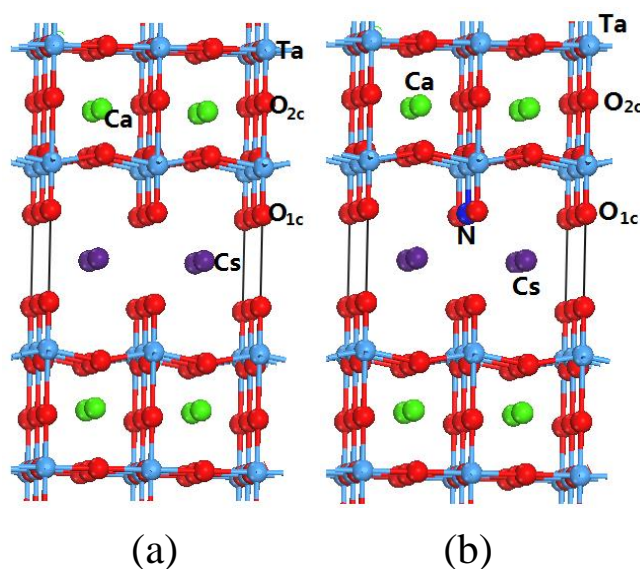

**Fig. S1** Structure models of undoped and nitrogen-doped  $\text{CsCa}_2\text{Ta}_3\text{O}_{10}$  for theoretical calculations. purple color, Cs; red, oxygen; green, calcium; blue, nitrogen; light blue, tantalum.

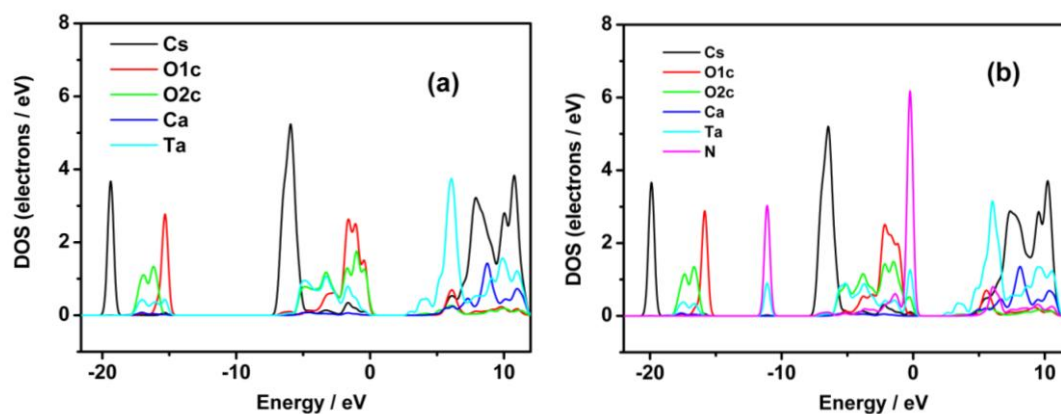

**Fig. S2** Partial density of states of (a) undoped  $\text{CsCa}_2\text{Ta}_3\text{O}_{10}$ , and (b) nitrogen-doped  $\text{CsCa}_2\text{Ta}_3\text{O}_{10}$ .

Supplementary Material (ESI) for Chemical Communications  
This journal is (c) The Royal Society of Chemistry 2010

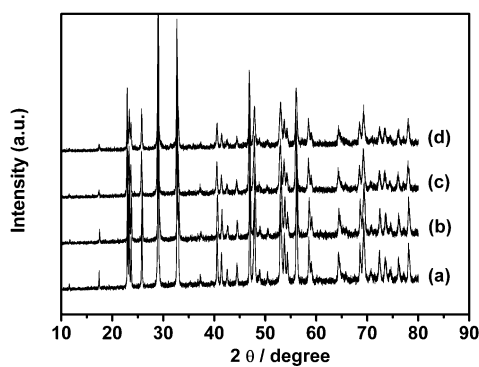

**Fig. S3** X-ray diffraction patterns of (a)  $\text{CsCa}_2\text{Ta}_3\text{O}_{10}$  and (b)-(d) nitrogen-doped  $\text{CsCa}_2\text{Ta}_3\text{O}_{10}$  samples prepared by calcining  $\text{CsCa}_2\text{Ta}_3\text{O}_{10}$  in ammonia gas flow at 973, 1023, and 1073 K, respectively.

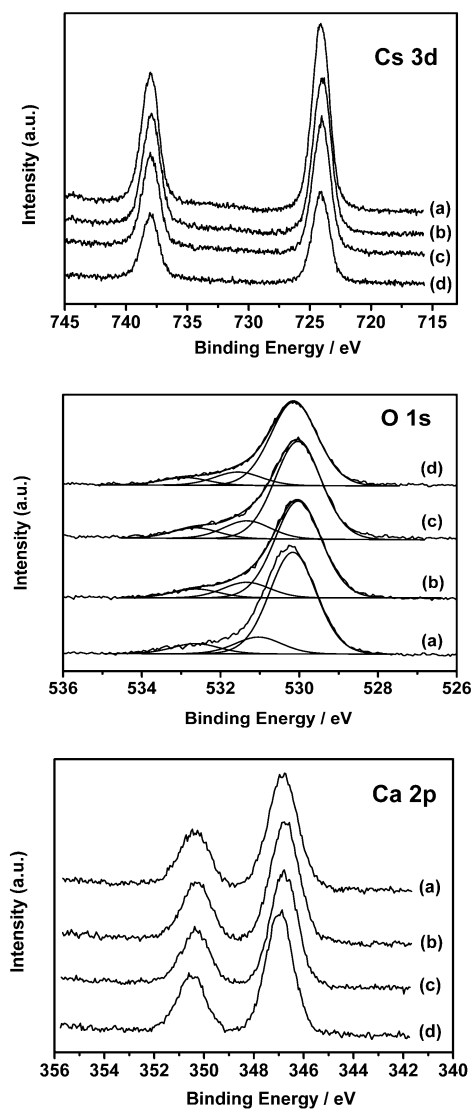

**Fig. S4** High-resolution XPS spectra of O1s, Cs3d, and Ca 2p measured on (a)  $\text{CsCa}_2\text{Ta}_3\text{O}_{10}$  and (b)-(d) nitrogen-doped  $\text{CsCa}_2\text{Ta}_3\text{O}_{10}$  samples prepared by calcining  $\text{CsCa}_2\text{Ta}_3\text{O}_{10}$  precursor in ammonia atmosphere at 973, 1023, and 1073 K.

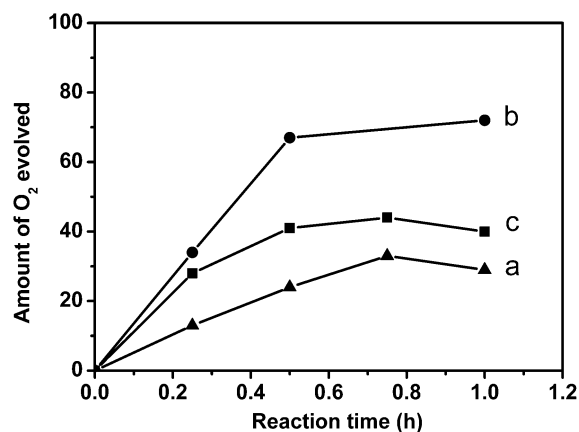

**Fig. S5** Time courses of photocatalytic O<sub>2</sub> evolution on nitrogen-doped CsCa<sub>2</sub>Ta<sub>3</sub>O<sub>10</sub> photocatalysts prepared by calcining CsCa<sub>2</sub>Ta<sub>3</sub>O<sub>10</sub> precursor in ammonia atmosphere at (a) 1023 (15 h), (b) 1073 (15 h), and (c) 1023 (15 h) + 1073 (15 h) K.

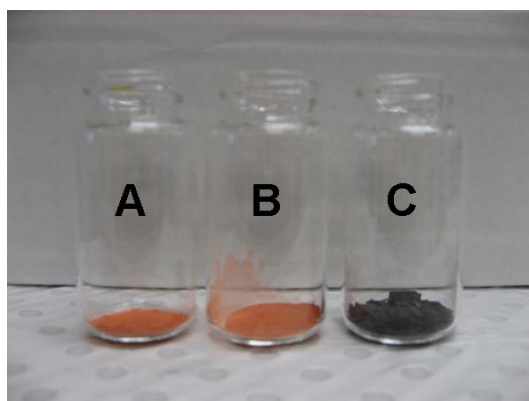

**Fig. S6** Photos of (A) original nitrogen-doped CsCa<sub>2</sub>Ta<sub>3</sub>O<sub>10</sub> sample, (B) nitrogen-doped CsCa<sub>2</sub>Ta<sub>3</sub>O<sub>10</sub> sample collected after photocatalytic H<sub>2</sub> evolution reaction in the presence of methanol, and (C) nitrogen-doped CsCa<sub>2</sub>Ta<sub>3</sub>O<sub>10</sub> sample collected after photocatalytic O<sub>2</sub> evolution reaction in the presence of AgNO<sub>3</sub>.
